# Supplementary material for: Lack of evidence—the anti-stepwise introduction of metal-on-metal hip replacements: A systematic review and a comparative assessment of the literature and registry data
Source: PubMed Central journal article supplement — Acta Orthop. 2017 Jul 18;88(5):478–83. doi: 10.1080/17453674.2017.1353794 (PMC5560208; doi:10.1080/17453674.2017.1353794), 2017-07-18
Supplement: IORT_A_1353794_SM4860.pdf [file IORT_A_1353794_SM4860.pdf]

## Supplementary data

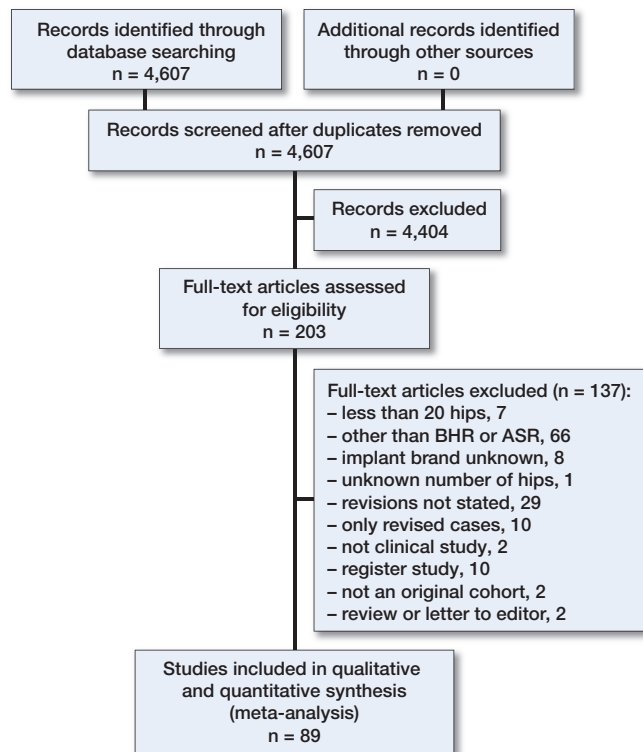

S 1. PRISMA flow chart

### S 2. PubMed search history

| Search | Add to builder | Query                                                                                                                                                                                                                                                                                                                                                                                                                                                                                                                                                                                                                                                                     | Items found |
|--------|----------------|---------------------------------------------------------------------------------------------------------------------------------------------------------------------------------------------------------------------------------------------------------------------------------------------------------------------------------------------------------------------------------------------------------------------------------------------------------------------------------------------------------------------------------------------------------------------------------------------------------------------------------------------------------------------------|-------------|
| #4 Add | Search         | (((((((asr AND hip) OR (bhr AND hip))) AND ("0001/01/01"[PDat] : "2013/12/31"[PDat] ))) NOT (((metal-on-metal AND hip) OR ("hip resurfacing" OR "surface replacement" AND hip) OR "large-diameter total hip" NOT (metal-on-metal)) AND (outcome OR revis* OR surv* OR complication* OR imaging* OR failu*))) AND ("0001/01/01"[PDat] : "2013/12/31"[PDat] ))) OR (((metal-on-metal AND hip) OR ("hip resurfacing" OR "surface replacement" AND hip) OR "large-diameter total hip" NOT (metal-on-metal)) AND (outcome OR revis* OR surv* OR complication* OR imaging* OR failu*)) AND ("0001/01/01"[PDat] : "2013/12/31"[PDat] ))) Filters: Publication date to 2013/12/31 | 2,700       |
| #3 Add | Search         | (((((((asr AND hip) OR (bhr AND hip))) AND ("0001/01/01"[PDat] : "2013/12/31"[PDat] ))) NOT (((metal-on-metal AND hip) OR ("hip resurfacing" OR "surface replacement" AND hip) OR "large-diameter total hip" NOT (metal-on-metal)) AND (outcome OR revis* OR surv* OR complication* OR imaging* OR failu*)) AND ("0001/01/01"[PDat] : "2013/12/31"[PDat] ))) Filters: Publication date to 2013/12/31                                                                                                                                                                                                                                                                      | 39          |
| #2 Add | Search         | ((asr AND hip) OR (bhr AND hip)) Filters: Publication date to 2013/12/31                                                                                                                                                                                                                                                                                                                                                                                                                                                                                                                                                                                                  | 126         |
| #1 Add | Search         | ((metal-on-metal AND hip) OR ("hip resurfacing" OR "surface replacement" AND hip) OR "large-diameter total hip" NOT (metal-on-metal)) AND (outcome OR revis* OR surv* OR complication* OR imaging* OR failu*)) Filters: Publication date to 2013/12/31                                                                                                                                                                                                                                                                                                                                                                                                                    | 2,661       |

## S 3. Scopus search history

| Search                                                                                                                                                                                                                                                                                                                                                                                                                                                                                                                                                                                                                                                                                                                                                                                                                                                                                                                                                                                                                                                                                                                      | Items found |
|-----------------------------------------------------------------------------------------------------------------------------------------------------------------------------------------------------------------------------------------------------------------------------------------------------------------------------------------------------------------------------------------------------------------------------------------------------------------------------------------------------------------------------------------------------------------------------------------------------------------------------------------------------------------------------------------------------------------------------------------------------------------------------------------------------------------------------------------------------------------------------------------------------------------------------------------------------------------------------------------------------------------------------------------------------------------------------------------------------------------------------|-------------|
| <ul style="list-style-type: none"> <li>History Search Identifier 7<br/>History Search Terms(((TITLE-ABS-KEY (metal-on-metal) AND TITLE-ABS-KEY (hip)) OR ((TITLE-ABS-KEY ("hip resurfacing") OR (TITLE-ABS-KEY ("surface replacement") AND TITLE-ABS-KEY (hip)) OR TITLE-ABS-KEY ("large-diameter total hip"))) AND NOT (TITLE-ABS-KEY (metal-on-metal)))) AND ((TITLE-ABS-KEY (outcome) OR TITLE-ABS-KEY (revis*) OR TITLE-ABS-KEY (surv*) OR TITLE-ABS-KEY (imaging*) OR TITLE-ABS-KEY (complication*) OR TITLE-ABS-KEY (failu*))) AND PUBYEAR &lt; 2014) OR ((TITLE-ABS-KEY ((asr AND hip) OR (bhr AND hip)) AND PUBYEAR &lt; 2014) AND NOT (((TITLE-ABS-KEY (metal-on-metal) AND TITLE-ABS-KEY (hip)) OR ((TITLE-ABS-KEY ("hip resurfacing") OR (TITLE-ABS-KEY ("surface replacement") AND TITLE-ABS-KEY (hip)) OR TITLE-ABS-KEY ("large-diameter total hip"))) AND NOT (TITLE-ABS-KEY (metal-on-metal)))) AND ((TITLE-ABS-KEY (outcome) OR TITLE-ABS-KEY (revis*) OR TITLE-ABS-KEY (surv*) OR TITLE-ABS-KEY (imaging*) OR TITLE-ABS-KEY (complication*) OR TITLE-ABS-KEY (failu*))) AND PUBYEAR &lt; 2014))</li> </ul> | 1,907       |
| <ul style="list-style-type: none"> <li>History Search Identifier 6<br/>History Search Terms(TITLE-ABS-KEY ((asr AND hip) OR (bhr AND hip)) AND PUBYEAR &lt; 2014) AND NOT (((TITLE-ABS-KEY (metal-on-metal) AND TITLE-ABS-KEY (hip)) OR ((TITLE-ABS-KEY ("hip resurfacing") OR (TITLE-ABS-KEY ("surface replacement") AND TITLE-ABS-KEY (hip)) OR TITLE-ABS-KEY ("large-diameter total hip"))) AND NOT (TITLE-ABS-KEY (metal-on-metal)))) AND ((TITLE-ABS-KEY (outcome) OR TITLE-ABS-KEY (revis*) OR TITLE-ABS-KEY (surv*) OR TITLE-ABS-KEY (imaging*) OR TITLE-ABS-KEY (complication*) OR TITLE-ABS-KEY (failu*))) AND PUBYEAR &lt; 2014)</li> </ul>                                                                                                                                                                                                                                                                                                                                                                                                                                                                       | 53          |
| <ul style="list-style-type: none"> <li>History Search Identifier 5<br/>History Search TermsTITLE-ABS-KEY ((asr AND hip) OR (bhr AND hip)) AND PUBYEAR &lt; 2014</li> </ul>                                                                                                                                                                                                                                                                                                                                                                                                                                                                                                                                                                                                                                                                                                                                                                                                                                                                                                                                                  | 164         |
| <ul style="list-style-type: none"> <li>History Search Identifier 4<br/>History Search Terms(((TITLE-ABS-KEY (metal-on-metal) AND TITLE-ABS-KEY (hip)) OR ((TITLE-ABS-KEY ("hip resurfacing") OR (TITLE-ABS-KEY ("surface replacement") AND TITLE-ABS-KEY (hip)) OR TITLE-ABS-KEY ("large-diameter total hip"))) AND NOT (TITLE-ABS-KEY (metal-on-metal)))) AND ((TITLE-ABS-KEY (outcome) OR TITLE-ABS-KEY (revis*) OR TITLE-ABS-KEY (surv*) OR TITLE-ABS-KEY (imaging*) OR TITLE-ABS-KEY (complication*) OR TITLE-ABS-KEY (failu*))) AND PUBYEAR &lt; 2014</li> </ul>                                                                                                                                                                                                                                                                                                                                                                                                                                                                                                                                                       | 1,854       |

## S 4. Studies included

| Author            | Year | Ref. | Patients | Hips | Acetabular side | Femoral side | Author           | Year | Ref. | Patients | Hips | Acetabular side | Femoral side |
|-------------------|------|------|----------|------|-----------------|--------------|------------------|------|------|----------|------|-----------------|--------------|
| Siebel            | 2006 | [1]  | 300      | 300  | ASR             | ASR          | McAndrew         | 2007 | [38] | 155      | 180  | BHR             | BHR          |
| Klein             | 2008 | [2]  |          | 115  | ASR             | ASR          | Giannini         | 2007 | [39] |          | 350  | BHR             | BHR          |
| Bergeron          | 2009 | [3]  | 209      | 228  | ASR             | ASR          | Hing             | 2007 | [40] |          | 230  | BHR             | BHR          |
| Isaac             | 2009 | [4]  |          | 77   | ASR             | ASR          | McBryde          | 2007 | [41] |          | 184  | BHR             | BHR          |
| Langton           | 2010 | [5]  |          | 418  | ASR             | ASR          | Daniel           | 2007 | [42] |          | 26   | BHR             | BHR          |
| Jameson           | 2010 | [6]  | 192      | 214  | ASR             | ASR          | Nishii           | 2007 | [43] |          | 50   | BHR             | BHR          |
| Langton (Arm 1)   | 2011 | [7]  |          | 59   | ASR             | ASR          | Heilpern         | 2008 | [44] | 98       | 110  | BHR             | BHR          |
| Langton (Arm 4)   | 2011 | [7]  |          | 430  | ASR             | ASR          | Marulanda        | 2008 | [45] |          | 230  | BHR             | BHR          |
| Malholtra         | 2012 | [8]  | 23       | 32   | ASR             | ASR          | Witzleb          | 2008 | [46] | 263      | 300  | BHR             | BHR          |
| Whitwell (Arm 1)  | 2012 | [9]  |          | 21   | ASR             | ASR          | Steffen          | 2008 | [47] |          | 610  | BHR             | BHR          |
| Bow               | 2012 | [10] |          | 103  | ASR             | ASR          | Pattyn           | 2008 | [48] |          | 250  | BHR             | BHR          |
| Kadar             | 2013 | [11] | 125      | 139  | ASR             | ASR          | McMinn           | 2008 | [49] |          | 110  | BHR             | BHR          |
| Reito (Arm 1)     | 2013 | [12] | 142      | 168  | ASR             | ASR          | McBryde          | 2008 | [50] |          | 909  | BHR             | BHR          |
| Whitehouse        | 2013 | [13] |          | 76   | ASR             | ASR          | McBryde          | 2008 | [51] |          | 96   | BHR             | BHR          |
| Langton           | 2013 | [14] |          | 246  | ASR             | ASR          | Jameson          | 2008 | [52] |          | 254  | BHR             | BHR          |
| Fernandez (Arm 1) | 2014 | [15] |          | 60   | ASR             | ASR          | Della Valle      | 2009 | [53] |          | 537  | BHR             | BHR          |
| Shemesh           | 2014 | [16] |          | 49   | ASR             | ASR          | Khan             | 2009 | [54] | 653      | 679  | BHR             | BHR          |
| Reito             | 2014 | [17] |          | 27   | ASR             | ASR          | Naal             | 2009 | [55] |          | 22   | BHR             | BHR          |
| Langton           | 2010 | [18] |          | 87   | ASR XL          |              | Ollivere         | 2009 | [56] |          | 463  | BHR             | BHR          |
|                   |      |      |          |      |                 | 57           | Swank            | 2009 | [57] |          | 128  | BHR             | BHR          |
|                   |      |      |          | 30   |                 |              | Lingard          | 2009 | [58] |          | 132  | BHR             | BHR          |
| Zhang             | 2010 | [19] |          | 34   | ASR XL          | Corail       | Malviya          | 2009 | [59] |          | 670  | BHR             | BHR          |
| Langton           | 2011 | [20] |          | 87   | ASR XL          | ASR          | Myers            | 2009 | [60] |          | 64   | BHR             | BHR          |
|                   |      |      |          | 57   |                 |              | Aulakh (Arm 1)   | 2010 | [61] | 95       | 101  | BHR             | BHR          |
|                   |      |      |          | 30   |                 |              | Aulakh (Arm 2)   | 2010 | [61] | 97       | 101  | BHR             | BHR          |
| Lavigne (Arm 3)   | 2011 | [21] |          | 32   | ASR XL          | Trilock      | Bose             | 2010 | [62] | 71       | 96   | BHR             | BHR          |
| Steele            | 2011 | [22] | 109      | 120  | ASR XL          | ns           | McBryde          | 2010 | [63] | 1826     | 2123 | BHR             | BHR          |
| Wynn-Jones        | 2011 | [23] | 54       | 62   | ASR XL          | Corail       | Rahman           | 2010 | [64] | 302      | 329  | BHR             | BHR          |
| Berthal           | 2012 | [24] |          | 70   | ASR XL          |              | Sandiford        | 2010 | [65] |          | 141  | BHR             | BHR          |
|                   |      |      |          | 64   |                 |              | Ollivere         | 2010 | [66] |          | 104  | BHR             | BHR          |
|                   |      |      |          | 6    |                 |              | Joseph           | 2010 | [67] |          | 26   | BHR             | BHR          |
| Whitwell (Arm 2)  | 2012 | [9]  |          | 100  | ASR XL          | Corail       | Baker            | 2011 | [68] |          | 63   | BHR             | BHR          |
| Hug               | 2013 | [25] |          | 149  | ASR XL          | Summit       | Delpport (Arm 1) | 2011 | [69] | 28       | 28   | BHR             | BHR          |
| Reito (Arm 2)     | 2013 | [12] | 281      | 312  | ASR XL          |              | Giannini         | 2011 | [70] | 134      | 142  | BHR             | BHR          |
|                   |      |      |          | 233  |                 |              | Langton (Arm 2)  | 2011 | [7]  |          | 1922 | BHR             | BHR          |
|                   |      |      |          | 54   |                 |              | Langton (Arm 5)  | 2011 | [7]  |          | 180  | BHR             | BHR          |
|                   |      |      |          | 24   |                 |              | Langton (Arm 6)  | 2011 | [7]  |          | 674  | BHR             | BHR          |
|                   |      |      |          | 1    |                 | P            | Madhu            | 2011 | [71] | 104      | 120  | BHR             | BHR          |
| Cip               | 2014 | [26] | 88       | 99   | ASR XL          | roxima       | McMinn           | 2011 | [72] |          | 3095 | BHR             | BHR          |
|                   |      |      |          | 97   |                 |              | Reito            | 2011 | [73] | 126      | 144  | BHR             | BHR          |
|                   |      |      |          | 2    |                 |              | van der Bracht   | 2011 | [74] |          | 297  | BHR             | BHR          |
|                   |      |      |          |      |                 |              | Loughead         | 2011 | [75] |          | 181  | BHR             | BHR          |
|                   |      |      |          |      |                 | ARGE         | Carrothers       | 2011 | [76] |          | 106  | BHR             | BHR          |
| Fernandez (Arm 2) | 2014 | [15] |          | 23   | ASR XL          | Proxima      | Coulter          | 2012 | [77] | 213      | 230  | BHR             | BHR          |
| Reito             | 2015 | [27] | 196      | 225  | ASR XL          |              | Hartmann         | 2012 | [78] | 95       | 100  | BHR             | BHR          |
|                   |      |      |          | 149  |                 |              | Holland          | 2012 | [79] | 90       | 100  | BHR             | BHR          |
|                   |      |      |          | 53   |                 |              | Murray           | 2012 | [80] | 554      | 646  | BHR             | BHR          |
|                   |      |      |          | 21   |                 |              | Nam (Arm 2)      | 2012 | [81] | 126      | 137  | BHR             | BHR          |
|                   |      |      |          | 1    |                 |              | Kohan            | 2012 | [82] |          | 840  | BHR             | BHR          |
| De Smet           | 2002 | [28] |          | 310  | BHR             | BHR          | MacKenzie        | 2012 | [83] |          | 499  | BHR             | BHR          |
| Pollard           | 2003 | [29] |          | 54   | BHR             | BHR          | Bisschop         | 2013 | [84] | 129      | 149  | BHR             | BHR          |
| McMinn            | 2003 | [30] |          | 1209 | BHR             | BHR          | Pailhe (Arm 2)   | 2013 | [85] |          | 42   | BHR             | BHR          |
| Daniel            | 2004 | [31] |          | 446  | BHR             | BHR          | van der Straeten | 2013 | [86] | 232      | 250  | BHR             | BHR          |
| De Smet           | 2005 | [32] |          | 252  | BHR             | BHR          | Whitehouse       | 2013 | [13] |          | 103  | BHR             | BHR          |
| Treacy            | 2005 | [33] |          | 144  | BHR             | BHR          | Matharu          | 2013 | [87] |          | 447  | BHR             | BHR          |
| McMinn            | 2005 | [34] |          | 232  | BHR             | BHR          | Nijman           | 2013 | [88] |          | 47   | BHR             | BHR          |
| Back              | 2005 | [35] |          | 230  | BHR             | BHR          | Nakasone         | 2013 | [89] |          | 43   | BHR             | BHR          |
| Pollard           | 2006 | [36] |          | 54   | BHR             | BHR          | Langton          | 2013 | [14] |          | 53   | BHR             | BHR          |
| Revell            | 2006 | [37] |          | 55   | BHR             | BHR          |                  |      |      |          |      |                 |              |

- 1 Siebel T, Maubach S, Morlock MM. Lessons learned from early clinical experience and results of 300 ASR hip resurfacing implantations. *Proc Inst Mech Eng H* 2006; 220: 345-53.
- 2 Klein M, Scherger B, Bernd H, et al. Complications after hip resurfacing using the ASR prosthesis in patients with osteoarthritis. *Z Orthop Unfall* 2008; 146: 179-84.
- 3 Bergeron S G, Desy N M, Nikolaou V S, et al. The early results of metal-on-metal hip resurfacing - a prospective study at a minimum two-year follow-up. *Bull NYU Hosp Jt Dis* 2009; 67: 132-4.
- 4 Isaac G H, Siebel T, Oakeshott R D, et al. Changes in whole blood metal ion levels following resurfacing: serial measurements in a multi-centre study. *Hip Int* 2009; 19: 330-7.
- 5 Langton D J, Jameson S S, Joyce T J, et al. Early failure of metal-on-metal bearings in hip resurfacing and large-diameter total hip replacement: A consequence of excess wear. *J Bone Joint Surg Br* 2010; 92: 38-46
- 6 Jameson S S, Langton D J, Nargol AV. Articular surface replacement of the hip: a prospective single-surgeon series. *J Bone Joint Surg Br* 2010; 92: 28-37.
- 7 Langton DJ, Joyce TJ, Jameson S S, et al. Adverse reaction to metal debris following hip resurfacing: the influence of component type, orientation and volumetric wear. *J Bone Joint Surg Br* 2011; 93: 164-71.
- 8 Malhotra R, Kannan A, Kumar V, et al. Hip resurfacing arthroplasty in inflammatory arthritis a 3- to 5-year follow-up study. *J Arthroplasty* 2012; 27: 15-20.
- 9 Whitwell G S, Shine A, Young S K. The articular surface replacement implant recall: a United Kingdom district hospital experience. *Hip Int* 2012; 22: 362-70.
- 10 Bow JK, Rudan JF, Grant HJ, et al. Are hip resurfacing arthroplasties meeting the needs of our patients? A 2-year follow-up study. *J Arthroplasty* 2012; 27: 984-9.
- 11 Kadar A, Ankory R, Sherman H, et al. Clinical and radiographic outcomes of 139 hips with articular surface replacement total hip arthroplasty\*. *Isr Med Assoc J* 2013; 15: 505-9.
- 12 Reito A, Puolakka T, Elo P, et al. High prevalence of adverse reactions to metal debris in small-headed ASR hips. *Clin Orthop Relat Res* 2013; 471: 2954-61.
- 13 Whitehouse M R, Aquilina A L, Patel S, et al. Survivorship, patient reported outcome and satisfaction following resurfacing and total hip arthroplasty. *J Arthroplasty* 2013; 28: 842-8.
- 14 Langton D J, Sidaginamale R P, Joyce T J, et al. The clinical implications of elevated blood metal ion concentrations in asymptomatic patients with MoM hip resurfacings: a cohort study. *BMJ Open* 2013; 3: 10.
- 15 Fernandez-Valencia J, Gallart X, Bori G, et al. Assessment of patients with a DePuy ASR metal-on-metal hip replacement: results of applying the guidelines of the Spanish Society of Hip Surgery in a tertiary referral hospital. *Adv Orthop* 2014; 2014: 982523.
- 16 Shemesh S, Kosashvili Y, Heller S, et al. Hip arthroplasty with the articular surface replacement (ASR) system: survivorship analysis and functional outcomes. *Eur J Orthop Surg Traumatol* 2014; 24: 925-30.
- 17 Reito A, Eskelinen A, Puolakka T, et al. Results of metal-on-metal hip resurfacing in patients 40 years old and younger. *Arch Orthop Trauma Surg* 2013; 133: 267-73 doi: 10.1007/s00402-012-1640-2; 10.1007/s00402-012-1640-2.
- 18 Langton D J, Jameson S S, Joyce T J, et al. Early failure of metal-on-metal bearings in hip resurfacing and large-diameter total hip replacement: A consequence of excess wear. *J Bone Joint Surg Br* 2010; 92: 38-46.
- 19 Zhang W, Titze M, Cappi B, et al. Improved mechanical long-term reliability of hip resurfacing prostheses by using silicon nitride. *J Mater Sci Mater Med* 2010; 21: 3049-57.
- 20 Langton D J, Jameson S S, Joyce T J, et al. Accelerating failure rate of the ASR total hip replacement. *J Bone Joint Surg Br* 2011; 93: 1011-6.
- 21 Lavigne M, Belzile EL, Roy A, et al. Comparison of whole-blood metal ion levels in four types of metal-on-metal large-diameter femoral head total hip arthroplasty: the potential influence of the adapter sleeve. *J Bone Joint Surg Am* 2011; 93 Suppl 2: 128-36.
- 22 Steele G D, Fehring T K, Odum S M, et al. Early failure of articular surface replacement XL total hip arthroplasty. *J Arthroplasty* 2011; 26: 14-8.
- 23 Wynn-Jones H, Macnair R, Wimhurst J, et al. Silent soft tissue pathology is common with a modern metal-on-metal hip arthroplasty. *Acta Orthop* 2011; 82: 301-7.
- 24 Bernthal N M, Celestre P C, Stavrakis A I, et al. Disappointing short-term results with the DePuy ASR XL metal-on-metal total hip arthroplasty. *J Arthroplasty* 2012; 27(4): 539-44.
- 25 Hug K T, Watters T S, Vail T P, et al. The withdrawn ASR THA and hip resurfacing systems: how have our patients fared over 1 to 6 years?. *Clin Orthop Relat Res* 2013; 471: 430-8.
- 26 Cip J, von Strempel A, Bach C, et al. Implication of femoral stem on performance of articular surface replacement (ASR) XL total hip arthroplasty. *J Arthroplasty* 2014; 29: 2127-35.
- 27 Reito A, Elo P, Puolakka T, et al. Femoral diameter and stem type are independent risk factors for ARMD in the large-headed ASR THR group. *BMC Musculoskelet Disord* 2015; 16: 118.
- 28 De Smet K, Pattyn C, Verdonck R. Early results of primary Birmingham hip resurfacing using a hybrid metal-on-metal couple. *Hip Int* 2002; 12: 158-62.
- 29 Pollard TCB, Basu C, Ainsworth R, et al. Is the Birmingham Hip Resurfacing worthwhile?. *Hip Int* 2003; 13: 25-8.
- 30 McMinn D J. Development of metal/metal hip resurfacing. *Hip Int L* 2003; 13: 41-53.
- 31 Daniel J, Pynsent P B, McMinn D J. Metal-on-metal resurfacing of the hip in patients under the age of 55 years with osteoarthritis. *J Bone Joint Surg Br* 2004; 86: 177-84.
- 32 De Smet K A. Belgium experience with metal-on-metal surface arthroplasty. *Orthop Clin North Am* 2005; 36: 203.
- 33 Treacy R B, McBryde C W, Pynsent P B. Birmingham hip resurfacing arthroplasty. A minimum follow-up of five years. *J Bone Joint Surg Br* 2005; 87: 167-70.
- 34 McMinn D J, Daniel J, Pynsent P B, et al. Mini-incision resurfacing arthroplasty of hip through the posterior approach. *Clin Orthop Relat Res* 2005; 441: 91-8.
- 35 Back D L, Dalziel R, Young D, et al. Early results of primary Birmingham hip resurfacings. An independent prospective study of the first 230 hips. *J Bone Joint Surg Br* 2005; 87: 324-9.
- 36 Pollard T C, Baker R P, Eastaugh-Waring S J, et al. Treatment of the young active patient with osteoarthritis of the hip. A five- to seven-year comparison of hybrid total hip arthroplasty and metal-on-metal resurfacing. *J Bone Joint Surg Br* 2006; 88: 592-600.
- 37 Revell M P, McBryde C W, Bhatnagar S, et al. Metal-on-metal hip resurfacing in osteonecrosis of the femoral head. *J Bone Joint Surg Am* 2006; 88 Suppl 3: 98-103.
- 38 McAndrew AR, Khaleel A, Bloomfield MD, et al. A district general hospital's experience of hip resurfacing. *Hip Int* 2007; 17: 1-3.
- 39 Giannini S, Moroni A, Romagnoli M. Hip resurfacing: mid-term results of the last-generation metal-on-metal devices. *Journal of orthopaedics and traumatology : official journal of the Italian Society of Orthopaedics and Traumatology* 2007; 8: 202-6.
- 40 Hing C B, Back D L, Bailey M, et al. The results of primary Birmingham hip resurfacings at a mean of five years. An independent prospective review of the first 230 hips. *J Bone Joint Surg Br* 2007; 89: 1431-8.
- 41 McBryde C W, Dehne K, Pearson A M, et al. One- or two-stage bilateral metal-on-metal hip resurfacing arthroplasty. *J Bone Joint Surg Br* 2007; 89: 1144-8.
- 42 Daniel J, Ziaee H, Pradhan C, et al. Blood and urine metal ion levels in young and active patients after Birmingham hip resurfacing arthroplasty: four-year results of a prospective longitudinal study. *J Bone Joint Surg Br* 2007; 89: 169-73.
- 43 Nishii T, Sugano N, Miki H, et al. Five-year results of metal-on-metal resurfacing arthroplasty in Asian patients. *J Arthroplasty* 2007; 22: 176-83.
- 44 Heilpern G N, Shah N N, Fordyce M J. Birmingham hip resurfacing arthroplasty: a series of 110 consecutive hips with a minimum five-year clinical and radiological follow-up. *J Bone Joint Surg Br* 2008; 90: 1137-42.

- 45 Marulanda G A, Wilson M S, Edwards P, et al. Early clinical experience with the use of the Birmingham hip resurfacing system. *Orthopedics* 2008; 31(12 Suppl 2).
- 46 Witzleb W C, Arnold M, Krummenauer F, et al. Birmingham Hip Resurfacing arthroplasty: short-term clinical and radiographic outcome. *Eur J Med Res* 2008; 13: 39-46.
- 47 Steffen R T, Pandit H P, Palan J, et al. The five-year results of the Birmingham Hip Resurfacing arthroplasty: an independent series. *J Bone Joint Surg Br* 2008; 90: 436-41.
- 48 Pattyn C, De Smet K A. Primary ceramic-on-ceramic total hip replacement versus metal-on-metal hip resurfacing in young active patients. *Orthopedics* 2008; 31: 1078.
- 49 McMinn D J, Daniel J, Ziaee H, et al. Results of the Birmingham Hip Resurfacing dysplasia component in severe acetabular insufficiency: a six- to 9.6-year follow-up. *J Bone Joint Surg Br* 2008; 90: 715-23.
- 50 McBryde C W, Revell M P, Thomas A M, et al. The influence of surgical approach on outcome in Birmingham hip resurfacing. *Clin Orthop Relat Res* 2008; 466: 920-6.
- 51 McBryde C W, Shears E, O'Hara J N, et al. Metal-on-metal hip resurfacing in developmental dysplasia: a case-control study. *J Bone Joint Surg Br* 2008; 90: 708-14.
- 52 Jameson S S, Langton D J, Natu S, et al. The influence of age and sex on early clinical results after hip resurfacing: an independent center analysis. *J Arthroplasty* 2008; 23: 50-5.
- 53 Della Valle C J, Nunley R M, Raterman S J, et al. Initial American experience with hip resurfacing following FDA approval. *Clin Orthop Relat Res* 2009; 467: 72-8.
- 54 Khan M, Kuiper J H, Edwards D, et al. Birmingham hip arthroplasty: five to eight years of prospective multicenter results. *J Arthroplasty* 2009; 24: 1044-50.
- 55 Naal F D, Kain M S, Hersche O, et al. Does hip resurfacing require larger acetabular cups than conventional THA?. *Clin Orthop Relat Res* 2009; 467: 923-8.
- 56 Ollivere B, Darrah C, Barker T, et al. Early clinical failure of the Birmingham metal-on-metal hip resurfacing is associated with metallosis and soft-tissue necrosis. *J Bone Joint Surg Br* 2009; 91: 1025-30.
- 57 Swank M L, Alkire M R. Minimally invasive hip resurfacing compared to minimally invasive total hip arthroplasty. *Bull NYU Hosp Jt Dis* 2009; 67: 113-5.
- 58 Lingard E A, Muthumayandi K, Holland J P. Comparison of patient-reported outcomes between hip resurfacing and total hip replacement. *J Bone Joint Surg Br* 2009; 91: 1550-4.
- 59 Malviya A, Holland J P. Pseudotumours associated with metal-on-metal hip resurfacing: 10-year Newcastle experience. *Acta Orthop Belg* 2009; 75: 477-83.
- 60 Myers G J, Morgan D, McBryde C W, et al. Does surgical approach influence component positioning with Birmingham Hip Resurfacing?. *Int Orthop* 2009; 33: 59-63.
- 61 Aulakh T S, Rao C, Kuiper J H, et al. Hip resurfacing and osteonecrosis: results from an independent hip resurfacing register. *Arch Orthop Trauma Surg* 2010; 130: 841-5.
- 62 Bose V C, Baruah B D. Resurfacing arthroplasty of the hip for avascular necrosis of the femoral head: a minimum follow-up of four years. *J Bone Joint Surg Br* 2010; 92: 922-8.
- 63 McBryde C W, Theivendran K, Thomas AM, et al. The influence of head size and sex on the outcome of Birmingham hip resurfacing. *J Bone Joint Surg Am* 2010; 92: 105-12.
- 64 Rahman L, Muirhead-Allwood S K, Alkinj M. What is the midterm survivorship and function after hip resurfacing?. *Clin Orthop Relat Res* 2010; 468: 3221-7.
- 65 Sandiford N A, Muirhead-Allwood S, Skinner J, et al. Early results of the Birmingham mid-head resection arthroplasty. *Surg Technol Int* 2009; 18: 195-200.
- 66 Ollivere B, Duckett S, August A, et al. The Birmingham Hip Resurfacing: 5-year clinical and radiographic results from a District General Hospital. *Int Orthop* 2010; 34: 631-4.
- 67 Joseph J, Mullen M, McAuley A, et al. Femoral neck resorption following hybrid metal-on-metal hip resurfacing arthroplasty: a radiological and biomechanical analysis. *Arch Orthop Trauma Surg* 2010; 130: 1433-8].
- 68 Baker R P, Pollard T C, Eastaugh-Waring S J, et al. A medium-term comparison of hybrid hip replacement and Birmingham hip resurfacing in active young patients. *J Bone Joint Surg Br* 2011; 93: 158-63.
- 69 Delpont H P, De Schepper J, Smith E J, et al. Resurfacing hip arthroplasty. A 3 to 5-year matched pair study of two different implant designs. *Acta Orthop Belg* 2011; 77: 609-15.
- 70 Giannini S, Cadossi M, Chiarello E, et al. Hip resurfacing arthroplasty: a series of 140 consecutive hips with a minimum five year follow-up. A clinical, radiological and histological analysis. *Hip Int* 2011; 21: 52-8.
- 71 Madhu T S, Akula M R, Raman R N, et al. The Birmingham hip resurfacing prosthesis: an independent single surgeon's experience at 7-year follow-up. *J Arthroplasty* 2011; 26: 1-8.
- 72 McMinn D J, Daniel J, Ziaee H, et al. Indications and results of hip resurfacing. *Int Orthop* 2011; 35: 231-7.
- 73 Reito A, Puolakka T, Pajamaki J. Birmingham hip resurfacing: five to eight year results. *Int Orthop* 2011; 35: 1119-24.
- 74 Van Der Bracht H, Eecken S V, Vyncke D, et al. Clinical and functional outcome of the Birmingham hip resurfacing. *Acta Orthop Belg* 2011; 77: 771-6.
- 75 Loughhead J M, Manning W, Holland J P. Outcome of hip resurfacing in obese patients. *Acta Orthop Belg* 2011; 77: 47-52.
- 76 Carrothers A D, Gilbert R E, Richardson J B. Birmingham hip resurfacing in patients who are seventy years of age or older. *Hip Int* 2011; 21: 217-24.
- 77 Coulter G, Young D A, Dalziel R E, et al. Birmingham hip resurfacing at a mean of ten years: results from an independent centre. *J Bone Joint Surg Br* 2012; 94: 315-21.
- 78 Hartmann A, Lutzner J, Kirschner S, et al. Do survival rate and serum ion concentrations 10 years after metal-on-metal hip resurfacing provide evidence for continued use?. *Clin Orthop Relat Res* 2012; 470: 3118-26.
- 79 Holland J P, Langton D J, Hashmi M. Ten-year clinical, radiological and metal ion analysis of the Birmingham Hip Resurfacing: from a single, non-designer surgeon. *J Bone Joint Surg Br* 2012; 94: 471-6.
- 80 Murray D W, Grammatopoulos G, Pandit H, et al. The ten-year survival of the Birmingham hip resurfacing: an independent series. *J Bone Joint Surg Br* 2012; 94: 1180-6.
- 81 Nam D, Maher P, Rebolledo B J, et al. A comparison of two resurfacing arthroplasty implants: medium-term clinical and radiographic results. *Hip Int* 2012; 22: 566-73.
- 82 Kohan L, Field C J, Kerr D R. Early complications of hip resurfacing. *J Arthroplasty* 2012; 27: 997-1002.
- 83 Alberta Hip Improvement Project, MacKenzie J R, O'Connor G J, et al. Functional outcomes for 2 years comparing hip resurfacing and total hip arthroplasty. *J Arthroplasty* 2012; 27: 750.
- 84 Bisschop R, Boomsma M F, Van Raay J J, et al. High prevalence of pseudotumors in patients with a Birmingham Hip Resurfacing Prosthesis: a prospective cohort study of one hundred and twenty-nine patients. *J Bone Joint Surg Am* 2013; 95: 1554-60.
- 85 Pailhe R, Reina N, Cavaignac E, et al. Prospective study comparing functional outcomes and revision rates between hip resurfacing and total hip arthroplasty: preliminary results for 2 years. *Orthop Rev (Pavia)* 2013; 5: e20.
- 86 Van Der Straeten C, Van Quickenborne D, De Roest B, et al. Metal ion levels from well-functioning Birmingham Hip Resurfacings decline significantly at ten years. *Bone Joint J* 2013; 95-B: 1332-8.
- 87 Matharu G S, McBryde C W, Pynsent W B, et al. The outcome of the Birmingham Hip Resurfacing in patients aged < 50 years up to 14 years post-operatively. *Bone Joint J* 2013; 95-B: 1172-7.
- 88 Nijman T H, Scholtes V A, de Meulemeester F R, et al. Short-term functional outcome after hip resurfacing surgery. *Eur J Orthop Surg Traumatol* 2013; 23: 197-202.
- 89 Nakasone S, Takao M, Sakai T, et al. Does the extent of osteonecrosis affect the survival of hip resurfacing?. *Clin Orthop Relat Res* 2013; 471: 1926-34.

S 5. Annual cumulative number of hips included in the published studies for each implant type. Growth indicates the change in hips included in the published studies each year compared with the previous year

| Year | BHR        |          |        | ASR HRA    |          |        | ASR XL THR |          |        |
|------|------------|----------|--------|------------|----------|--------|------------|----------|--------|
|      | Cumulative | Per year | Growth | Cumulative | Per year | Growth | Cumulative | Per year | Growth |
| 2002 | 310        | 310      | -      | -          | -        | -      | -          | -        | -      |
| 2003 | 1573       | 1263     | +307%  | -          | -        | -      | -          | -        | -      |
| 2004 | 2019       | 446      | -65%   | -          | -        | -      | -          | -        | -      |
| 2005 | 2877       | 858      | +92%   | -          | -        | -      | -          | -        | -      |
| 2006 | 2986       | 109      | -87%   | 300        | 300      | -      | -          | -        | -      |
| 2007 | 4006       | 1020     | +836%  | 300        | -        | -100%  | -          | -        | -      |
| 2008 | 6621       | 2615     | +156%  | 415        | 115      | -      | -          | -        | -      |
| 2009 | 9316       | 2695     | +3%    | 720        | 305      | +165%  | -          | -        | -      |
| 2010 | 12337      | 3021     | +12%   | 1352       | 632      | +107%  | 121        | 121      | -      |
| 2011 | 19318      | 6981     | +131%  | 1841       | 489      | -23%   | 422        | 301      | +149%  |
| 2012 | 21870      | 2552     | -63%   | 1997       | 156      | -68%   | 592        | 170      | -44%   |
| 2013 | 23048      | 1178     | -54%   | 2626       | 629      | +303%  | 1053       | 461      | +171%  |
